# Supplementary material
Source: Springer Nature journal article supplement (https://www.springermedizin.de/resource/supplementary/12958_2008_457_MOESM1_ESM.pdf/9567940)

A

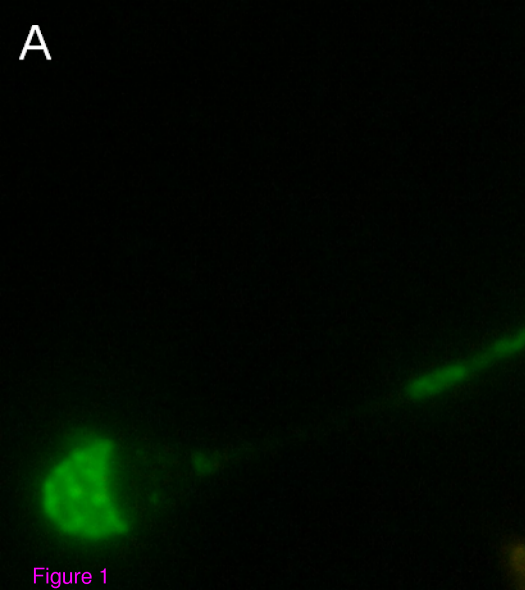

Figure 1

B

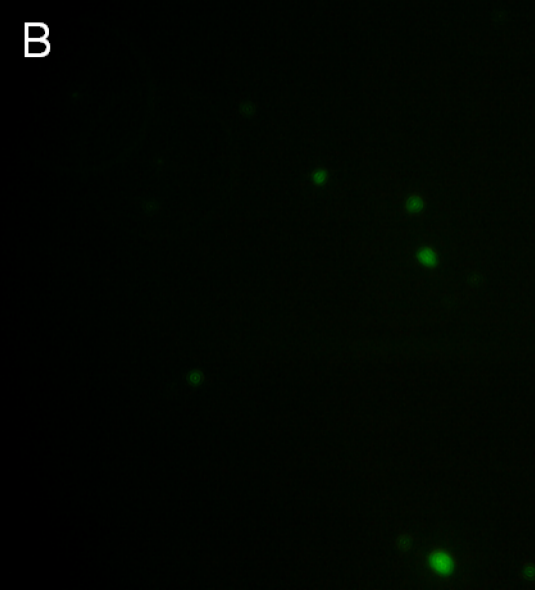

Supplement: MOESM1 [file 9567940]
